# Supplementary material
Source: MDPI journal article supplement (https://www.mdpi.com/2227-9032/10/6/1017)
Supplement: s1 [file s1]

Archive with 2 entries (2 files):
- PANINI CRF.pdf
- panini protocol.pdf
